# Supplementary material for: A phenanthrene[9,10-d]imidazole-phenol-based fluorescent probe combining ESIPT and AIE for the “turn-on” detection of Cu2+ with green-emission and improved Stokes’ shift, and its application
Source: Royal Society of Chemistry journal article supplement (doi:10.1039/d1nj02177j), 2021-01-01
Supplement: d1nj02177j1.pdf [file d1nj02177j1.pdf]

## Supporting Information

### **A phenanthrene[9,10-*d*]imidazole-phenol-based fluorescent probe combined ESIPT and AIE for “turn-on” detection of Cu<sup>2+</sup> with a green-emitting and improved stokes shift and its application**

Jiahui Du <sup>a</sup>, Bing Zhao <sup>\*a,b</sup>, Wei Kan <sup>\*a,b</sup>, Haochun Yin<sup>a</sup>, Tianshu Song<sup>a</sup>, Liyan Wang<sup>a,b</sup>, Li Sun<sup>a</sup>,  
Xiuwen Wang<sup>a</sup>, Guangming Yin<sup>a</sup>, Jianxin Wang<sup>c</sup>

a.Chemistry and Chemical Engineering Institute, Qiqihar University, Qiqihar 161006, China. E-mail: zhao\_submit@aliyun.com (Bing Zhao), kan\_wei@aliyun.com (Wei Kan)

b.Heilongjiang Provincial Key Laboratory of Surface Active Agent and Auxiliary, Qiqihar 161006, China

c.College of Material Science and Engineering, Qiqihar 161006, China

## Contents

- Fig. S1** Fluorescence intensities of PIA(OH)-Py in water/DMF solution with different competing metal cations or anions and  $\text{Cu}^{2+}$
- Fig. S2** Time-dependent fluorescence spectra of PIA(OH)-Py (10  $\mu\text{M}$ ) upon addition of  $\text{Cu}^{2+}$  (50  $\mu\text{M}$ , respectively) in aqueous solution ( $v_{\text{DMF}}/v_{\text{H}_2\text{O}}$ , 1:1, pH = 7.40). Blue: PIA(OH)-Py +  $\text{Cu}^{2+}$ ; Red: PIA(OH)-Py.
- Fig. S3**  $^1\text{H}$  NMR spectra of PIA(OH)-Py upon the addition of 1.0 equiv.  $\text{Cu}^{2+}$  ions in  $\text{DMSO}-d_6$ .
- Fig. S4** Job plot for the determination of the stoichiometry of PIA(OH)-Py and  $\text{Cu}^{2+}$  in the complex in DMF/ $\text{H}_2\text{O}$  (1:1, v/v, pH = 7.4) solution.
- Fig. S5** Cytotoxicity of the probe at various concentrations (0  $\mu\text{M}$ , 5  $\mu\text{M}$ , 10  $\mu\text{M}$ , 20  $\mu\text{M}$ , 30  $\mu\text{M}$ , 40  $\mu\text{M}$  and 50  $\mu\text{M}$ ) in living Hela cells for 3 h. The results are the mean standard deviation of three separate measurements.
- Fig. S6** Infrared spectrum of PIA(OH)-Py
- Fig. S7**  $^1\text{H}$  NMR spectrum of PIA(OH)-Py
- Fig. S8**  $^{13}\text{C}$  NMR spectrum of PIA(OH)-Py
- Fig. S9** ESI-MS of PIA(OH)-Py

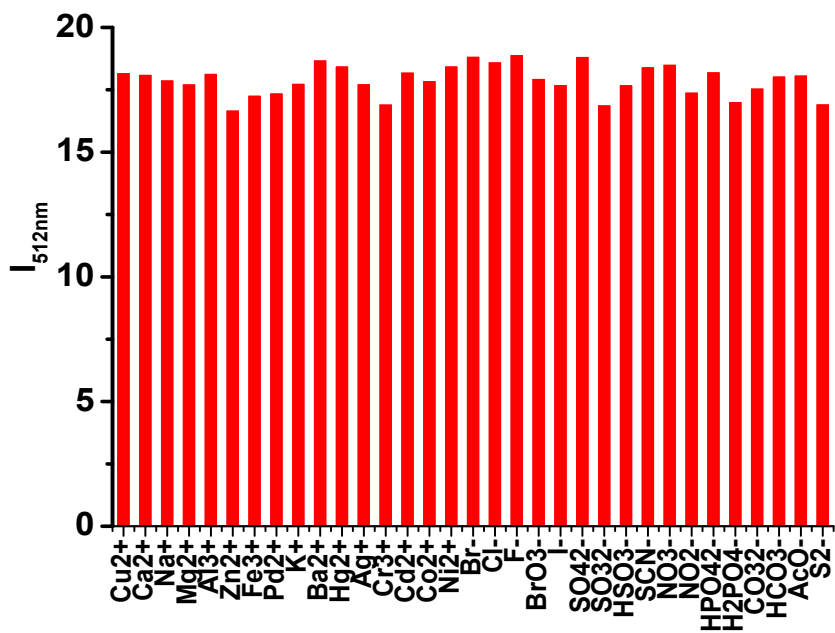

Fig. S1 Fluorescence intensities of PIA(OH)-Py in water/DMF solution with different competing metal cations or anions and Cu<sup>2+</sup>

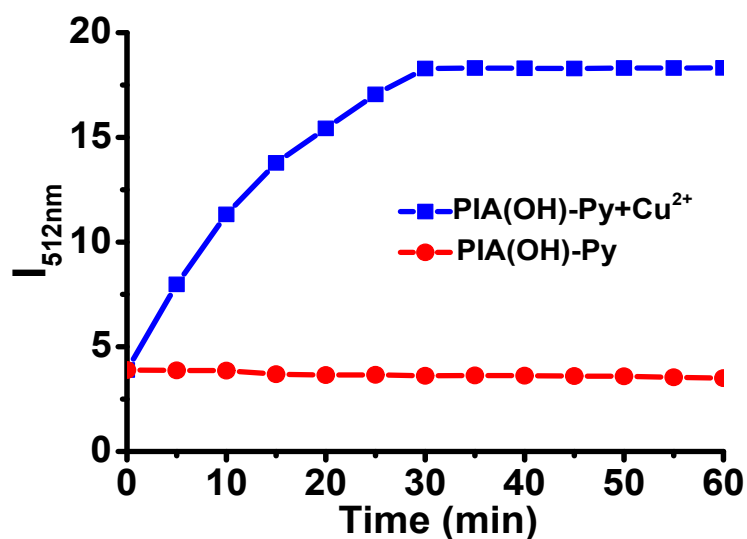

Fig. S2 Time-dependent fluorescence spectra of PIA(OH)-Py (10  $\mu\text{M}$ ) upon addition of Cu<sup>2+</sup> (50  $\mu\text{M}$ , respectively) in aqueous solution ( $v_{\text{DMF}}/v_{\text{H}_2\text{O}}$ , 1:1, pH=7.40). Blue: PIA(OH)-Py-Cu<sup>2+</sup>; Red: PIA(OH)-Py.

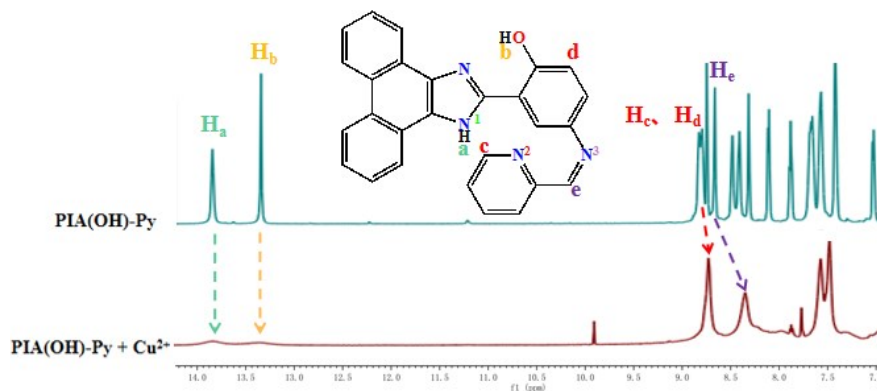

Fig. S3  $^1\text{H}$  NMR spectra of **PIA(OH)-Py** upon the addition of 1.0 equiv.  $\text{Cu}^{2+}$  ions in  $\text{DMSO}-d_6$ .

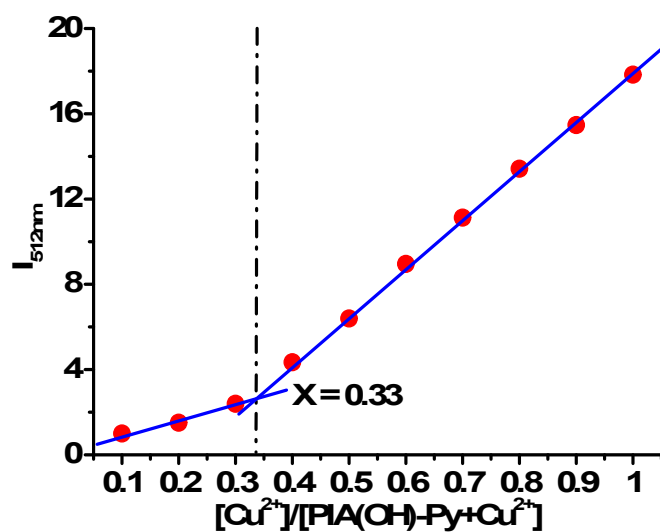

Fig. S4 Job plot for the determination of the stoichiometry of **PIA(OH)-Py** and  $\text{Cu}^{2+}$  in the complex in  $\text{DMF}/\text{H}_2\text{O}$  (1:1, v/v, pH = 7.4) solution.

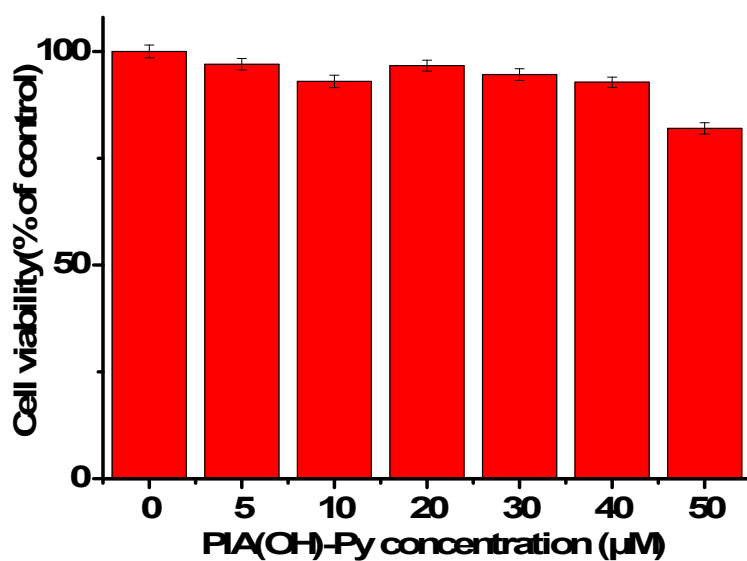

Fig. S5 Cytotoxicity of the probe at various concentrations (0 µM, 5µM, 10 µM, 20 µM, 30 µM, 40µM and 50 µM) in living Hela cells for 3 h. The results are the mean standard deviation of three separate measurements.

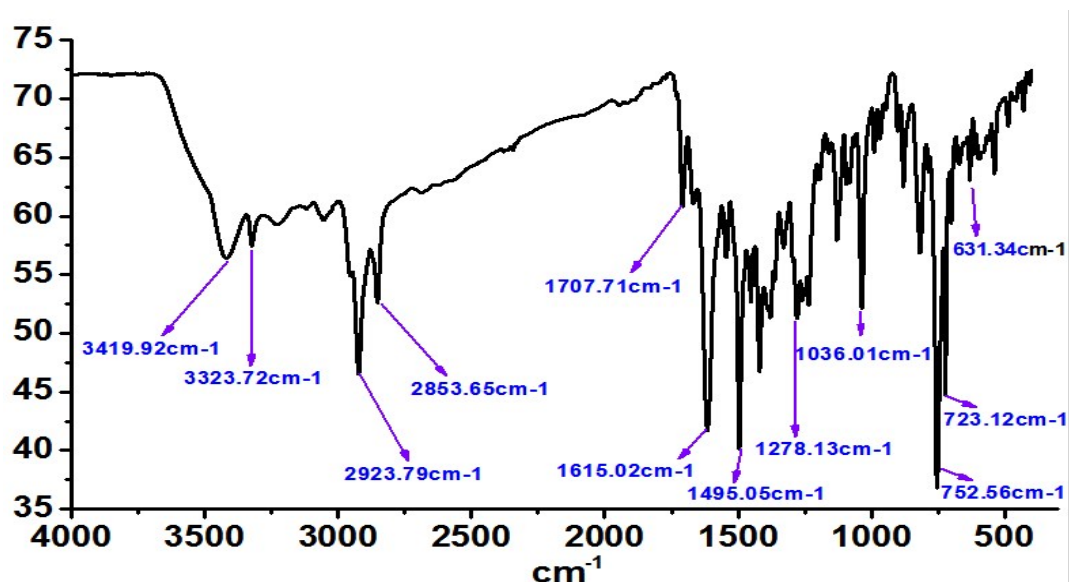

Fig. S6 Infrared spectrum of PIA(OH)-Py



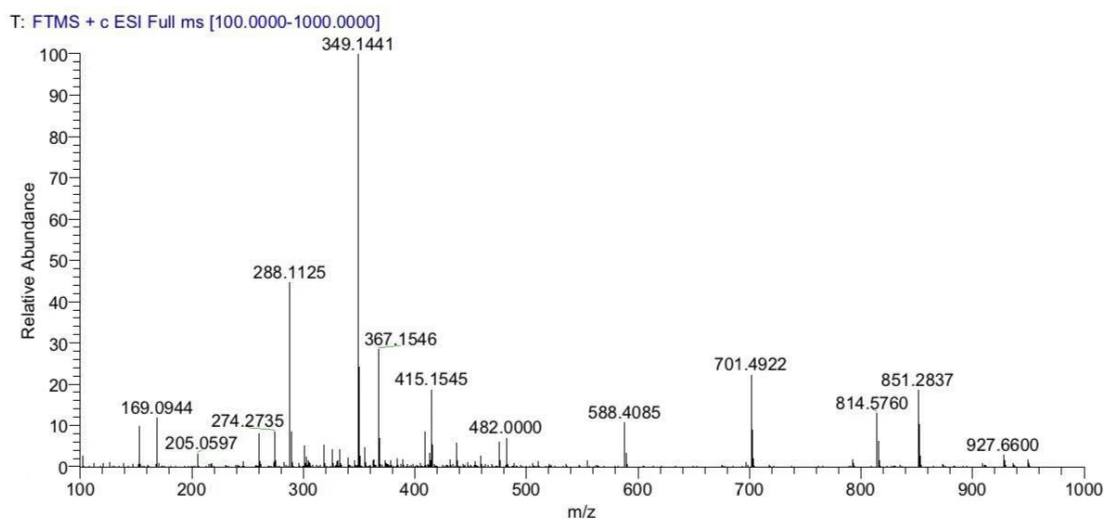

Fig. S9 ESI-MS of **PIA(OH)-Py**
